# Supplementary material
Source: Springer Nature journal article supplement (https://www.springermedizin.de/resource/supplementary/12943_2010_773_MOESM10_ESM.pdf/9554784)

**A**

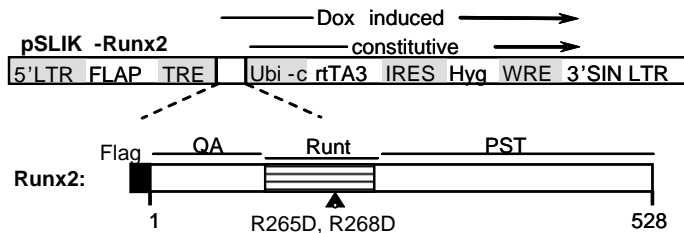

**B**

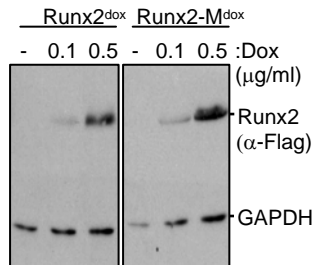

**C**

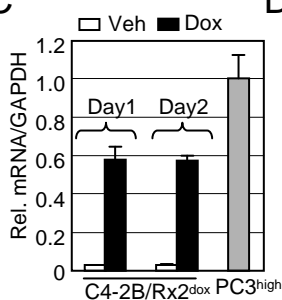

**D**

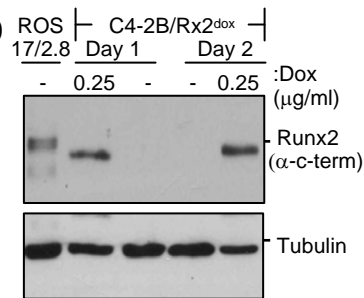

**E**

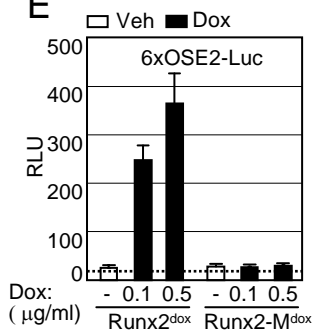

**F**

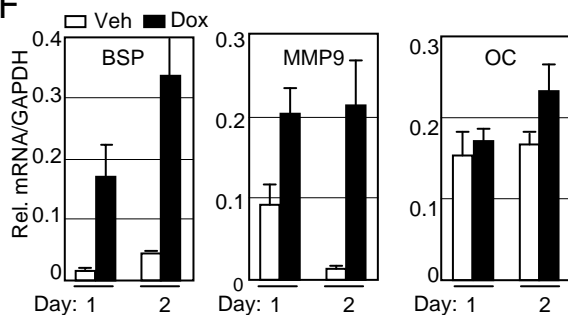

Supplement: MOESM10 [file 9554784]
